# Supplementary material
Source: Springer Nature journal article supplement (https://www.springermedizin.de/resource/supplementary/12943_2009_519_MOESM4_ESM.pdf/9554960)

**A**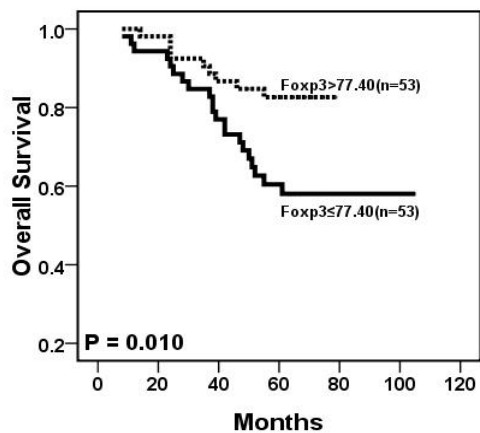**B**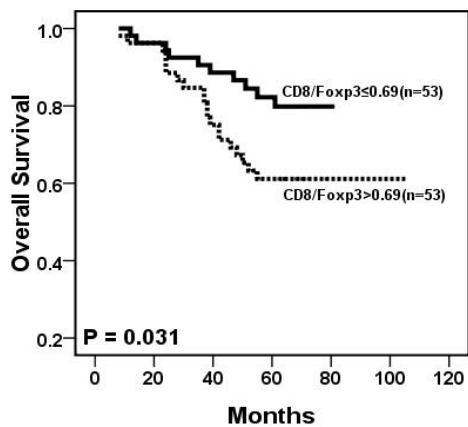**C**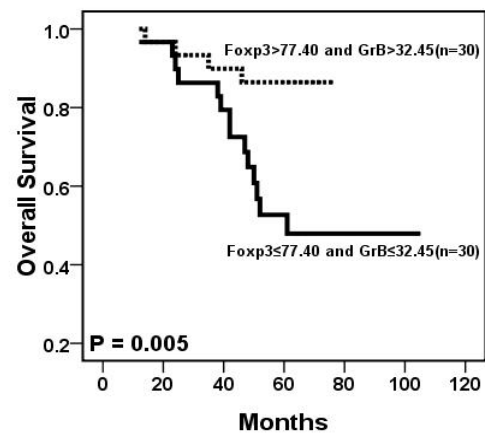**D**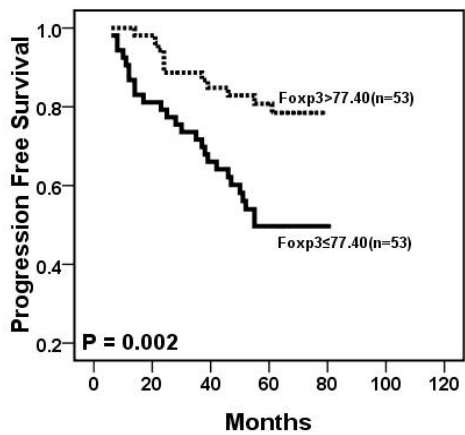**E**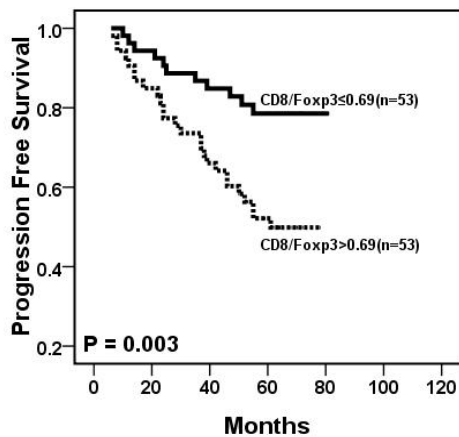**F**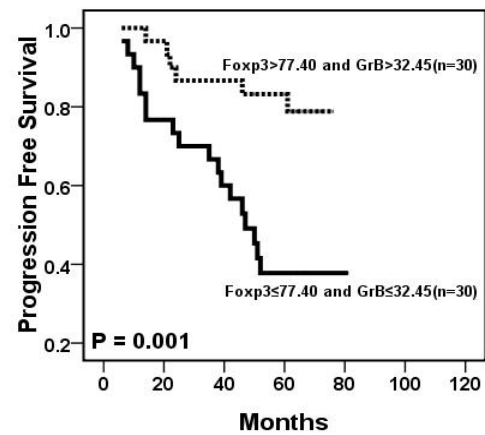

Supplement: MOESM4 [file 9554960]
